# Supplementary material for: Uptake without inactivation of human adenovirus type 2 by Tetrahymena pyriformis ciliates
Source: Royal Society of Chemistry journal article supplement (doi:10.1039/d3em00116d), 2023-01-01
Supplement: d3em00116d2.pdf [file d3em00116d2.pdf]

Supplemental material for  
Uptake without inactivation of human adenovirus type 2 by  
*Tetrahymena pyriformis* ciliates

Margot Olive<sup>a</sup>, Jean Daraspe<sup>b</sup>, Christel Genoud<sup>b</sup>, Tamar Kohn<sup>a\*</sup>

<sup>a</sup>Laboratory of Environmental Chemistry, School of Architecture, Civil and Environmental Engineering (ENAC), École Polytechnique Fédérale de Lausanne (EPFL), Lausanne, Switzerland

<sup>b</sup>Electron Microscopy Facility, Faculty of Biology and Medicine, University of Lausanne (UNIL), Lausanne, Switzerland

\*Corresponding author email addresses: [tamar.kohn@epfl.ch](mailto:tamar.kohn@epfl.ch)

Running title: Interaction of human adenovirus type 2 with ciliates.

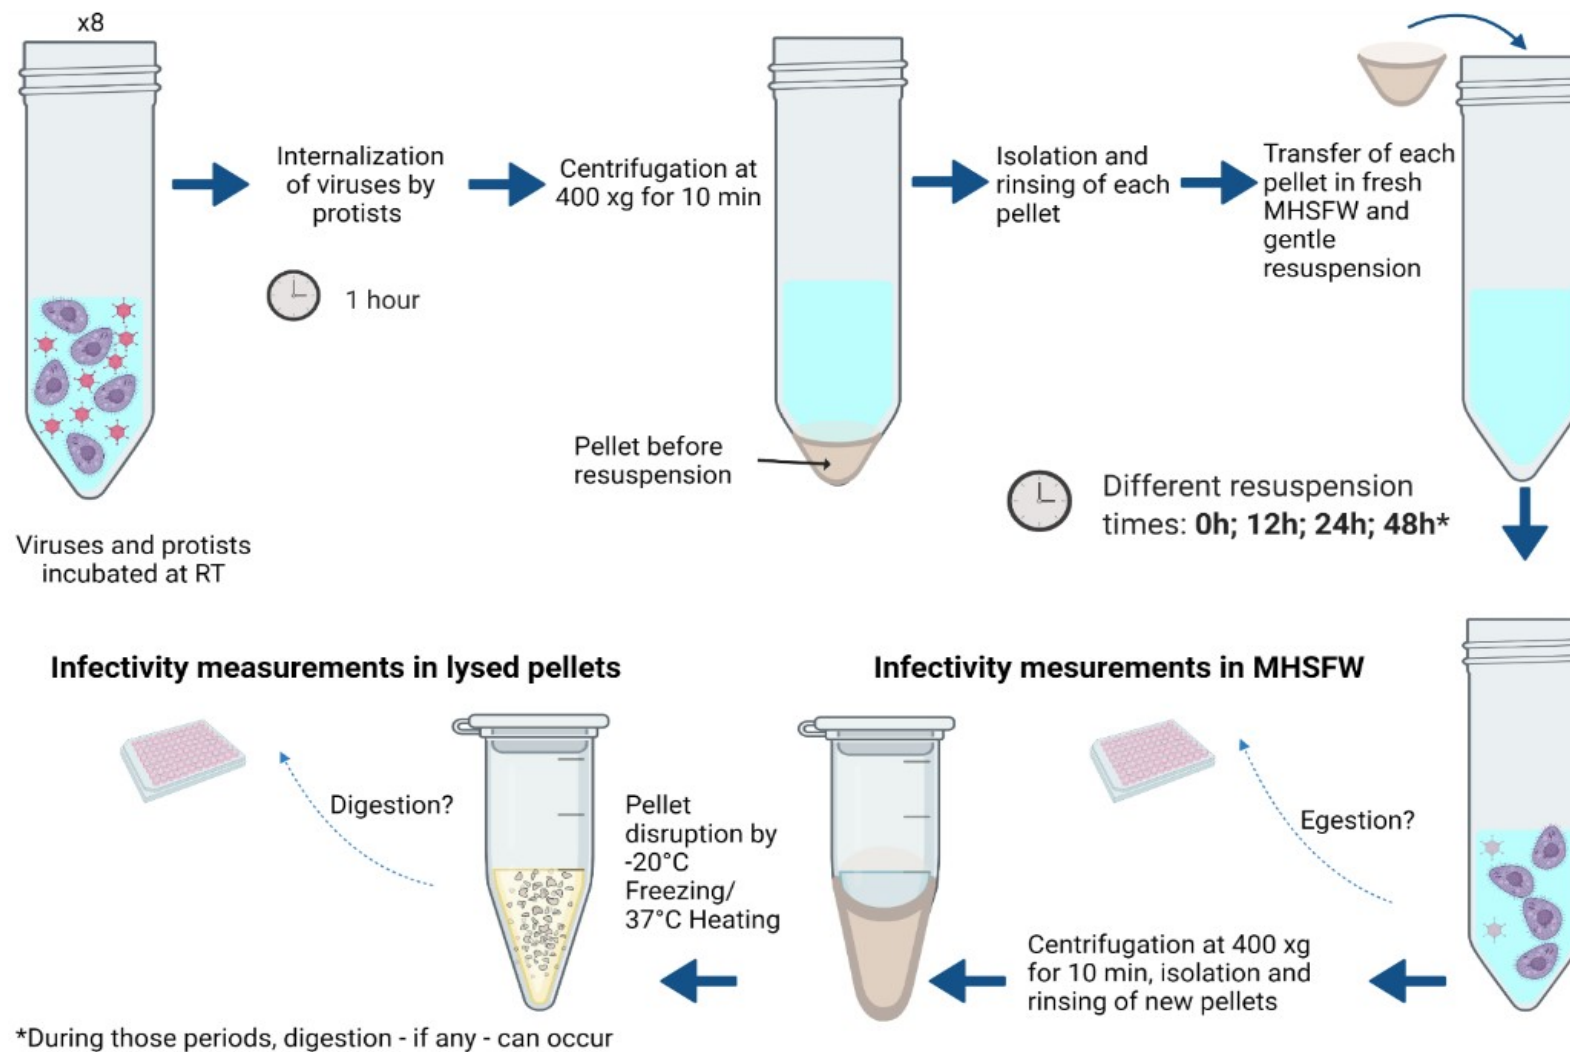

Figure S1: **Experimental design to study egestion and digestion** (created with Biorender)

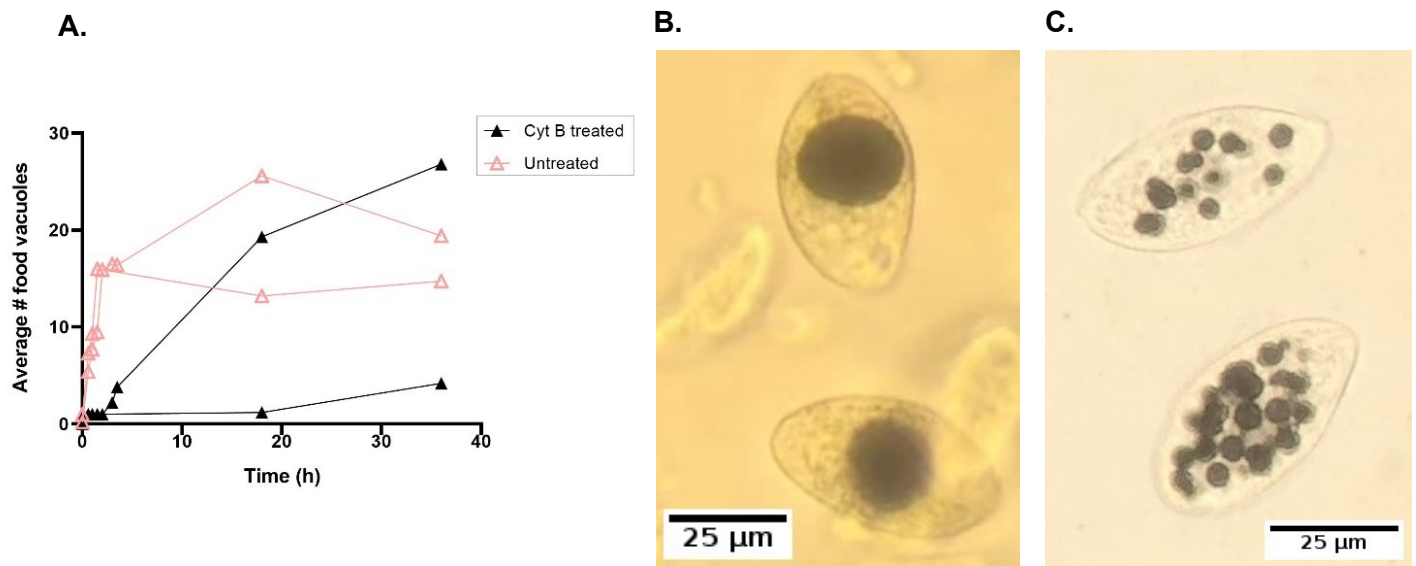

**Figure S2: Effect of Cytochalasin B on food vacuoles** (A) Monitoring of food vacuole formation for Cyt B treated and untreated *T. pyriformis* (full time course, in duplicate) (B) Light microscopy image of carbon-stained food vacuoles from Cyt B treated-*T. pyriformis* and (C) untreated *T. pyriformis* (approximative scale-bar).

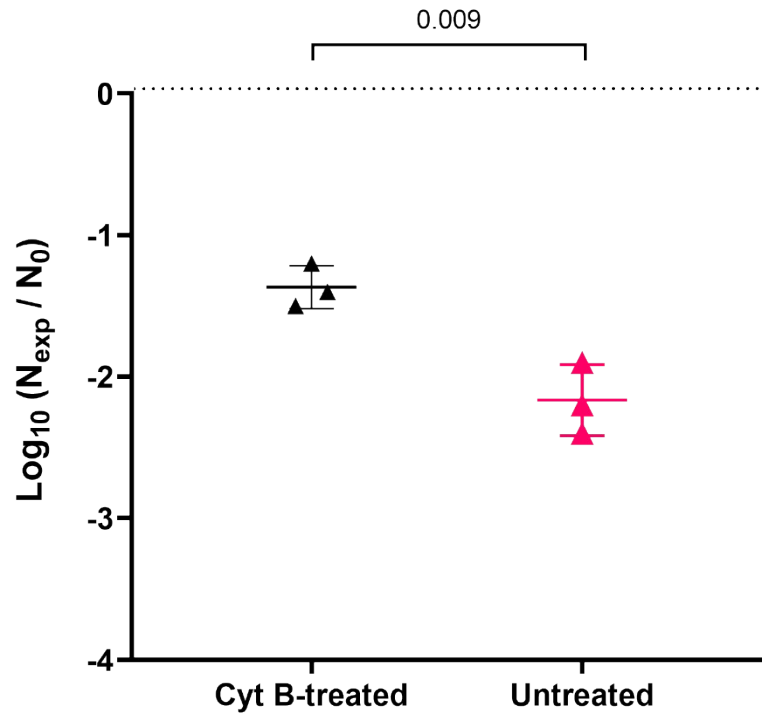

Figure S3: Log<sub>10</sub> reduction in HAdV2 genomic copies after a 21h co-incubation of the virus with either Cytochalasin B-treated *T. pyriformis* or non-treated organisms. The initial virus titer was  $2 \times 10^7$  GC  $\times$  ml<sup>-1</sup> and  $4 \times 10^6$  MPN  $\times$  ml<sup>-1</sup>. The initial *T. pyriformis* concentration was  $7 \times 10^4$  cells  $\times$  ml<sup>-1</sup>. The horizontal bars indicate the mean value of three replicates and the vertical bars indicate the standard deviation. The p-value is indicated above (unpaired two-sided t-test;  $t(4)=4.707$ ; p-value = 0.009).

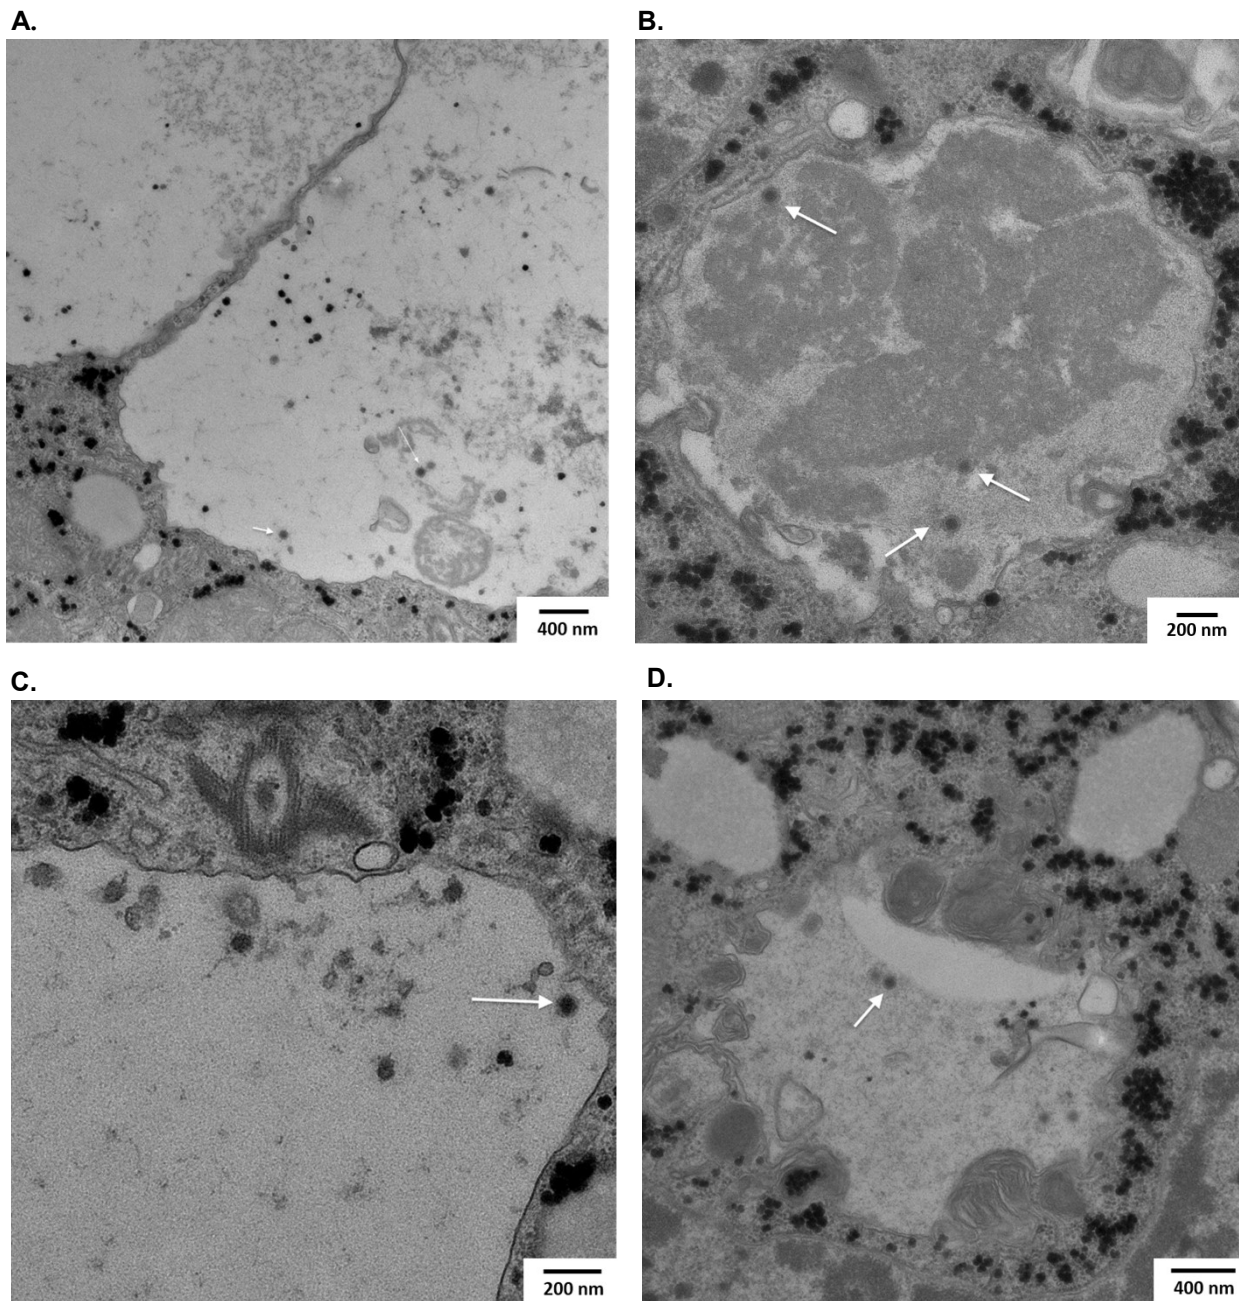

Figure S4: (A) to (D) Transmission electron microscopy views of HAdV2 particles in food vacuoles of exposed *T. pyriformis*.
